# Supplementary material for: Synthesis of a BiOCl1−xBrx@AgBr heterostructure with enhanced photocatalytic activity under visible light
Source: Royal Society of Chemistry journal article supplement (doi:10.1039/c8ra02971g), 2018-01-01
Supplement: c8ra02971g1.pdf [file c8ra02971g1.pdf]

## Electronic Supplementary Information

### **Synthesis of $\text{BiOCl}_{1-x}\text{Br}_x$ @AgBr heterostructure with enhanced photocatalytic activity under visible light**

Chenghe Hua, Xiaoli Dong\*, Yu Wang, Nan Zheng, Hongchao Ma, Xiufang Zhang

School of Light Industry and Chemical Engineering, Dalian Polytechnic University,  
#1 Qinggongyuan, Dalian 116034, P R China

**\*Corresponding author: [dongxiaoli65@163.com](mailto:dongxiaoli65@163.com)**

Tel.: +86-411-86323009, Fax: +86-411-86323736

## Experimental

### Synthesis of AgBr/BiOCl<sub>1-x</sub>Br<sub>x</sub> heterostructure

0.033g Silver nitrate (AgNO<sub>3</sub>), and 0.1g BiOCl<sub>1-x</sub>Br<sub>x</sub> nanosheets were dispersed into 20 mL heated EG (105 °C), after cooling down to 50 °C, 10 mL ethanol was added drop by drop followed by vigorously stirring. Then 0.1 g CTAB was added to the mixture following by vigorously stirring for 20 min. The mixture was then transferred into 50 mL Teflon-lined autoclave and sealed into the oven under 160 °C for 5 h. After cooling down to room temperature, the precipitates were collected and washed with deionized water and ethanol alternately. After dried in oven at 60 °C for 8 h, the sample was collected and denoted as AgBr/BiOCl<sub>1-x</sub>Br<sub>x</sub>.

## Results and discussion

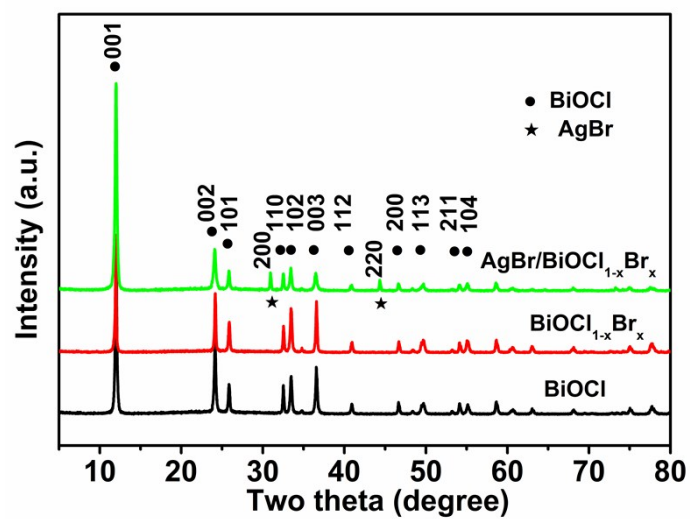

Fig. S1 XRD diffraction patterns of BiOCl, BiOCl<sub>1-x</sub>Br<sub>x</sub> and AgBr/BiOCl<sub>1-x</sub>Br<sub>x</sub>

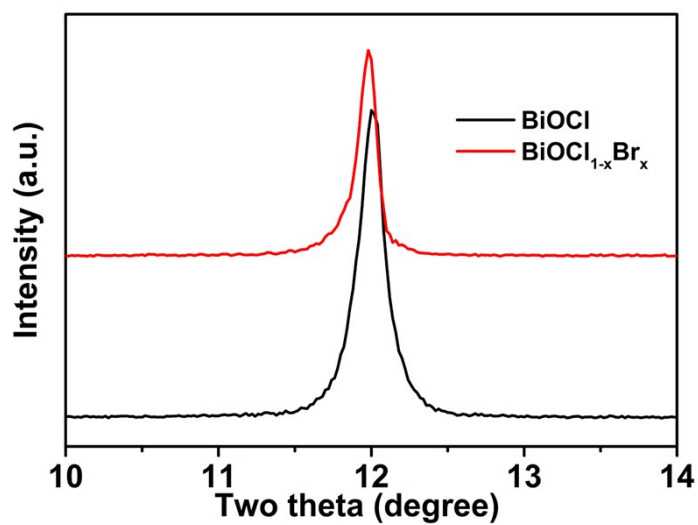

Fig. S2 The amplified XRD patterns of BiOCl and BiOCl<sub>1-x</sub>Br<sub>x</sub>

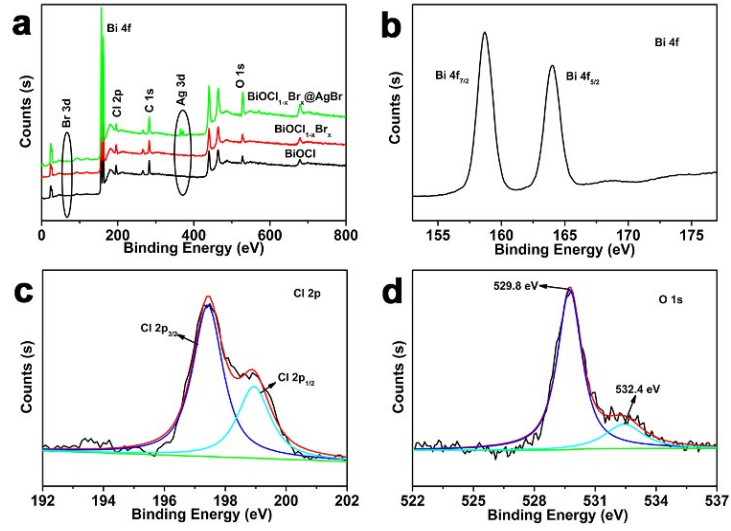

**Fig. S3** XPS spectra of BiOCl: (a) survey spectra, (b) Bi, (c) Cl, (d) O

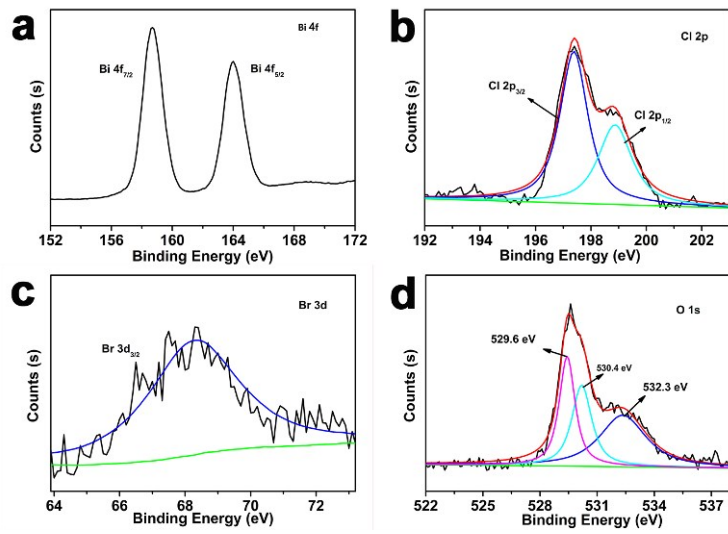

**Fig. S4** XPS spectra of  $\text{BiOCl}_{1-x}\text{Br}_x$ : (a) Bi, (b) Cl, (c) Br, (d) O

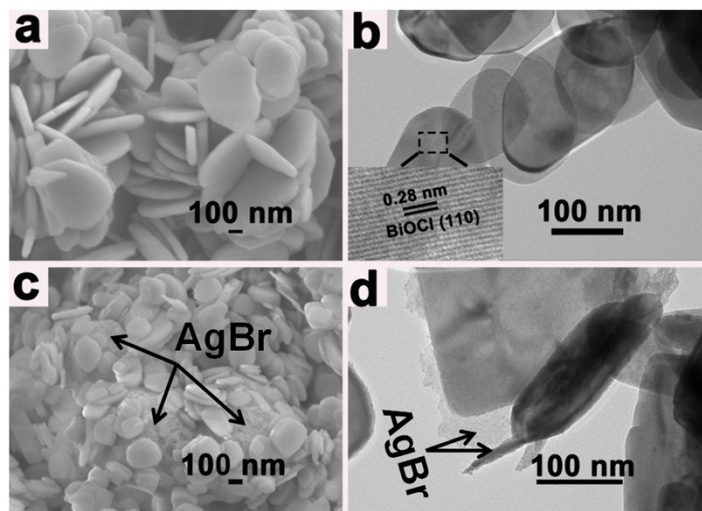

**Fig. S5** (a) SEM image of  $\text{BiOCl}_{1-x}\text{Br}_x$ , (b) TEM image of  $\text{BiOCl}_{1-x}\text{Br}_x$ , (c) SEM image of  $\text{AgBr}/\text{BiOCl}_{1-x}\text{Br}_x$ , (d) TEM image of  $\text{BiOCl}_{1-x}\text{Br}_x@\text{AgBr}$

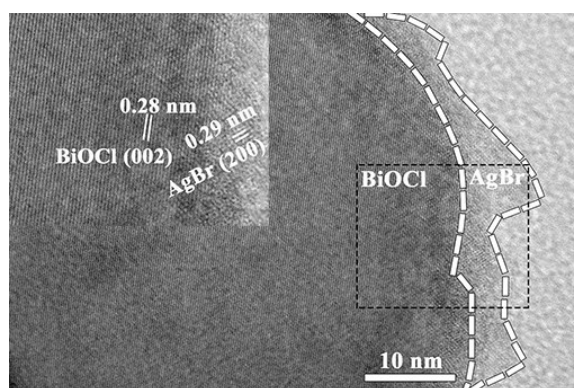

**Fig. S6** HRTEM image of  $\text{BiOCl}_{1-x}\text{Br}_x@\text{AgBr}$

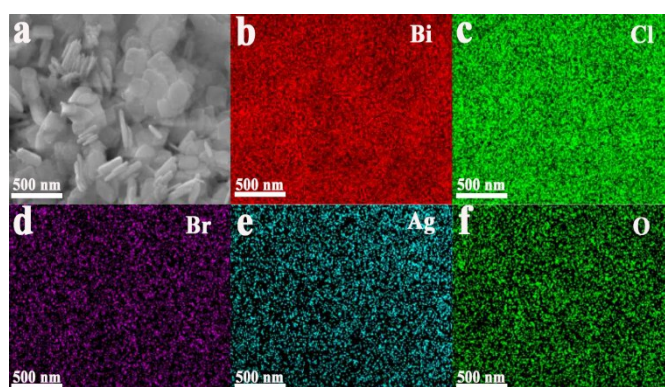

**Fig. S7** EDS images of  $\text{BiOCl}_{1-x}\text{Br}_x@AgBr$ : (a) SEM image, (b) Bi, (c) Cl, (d) Br, (e) Ag, and (f) O

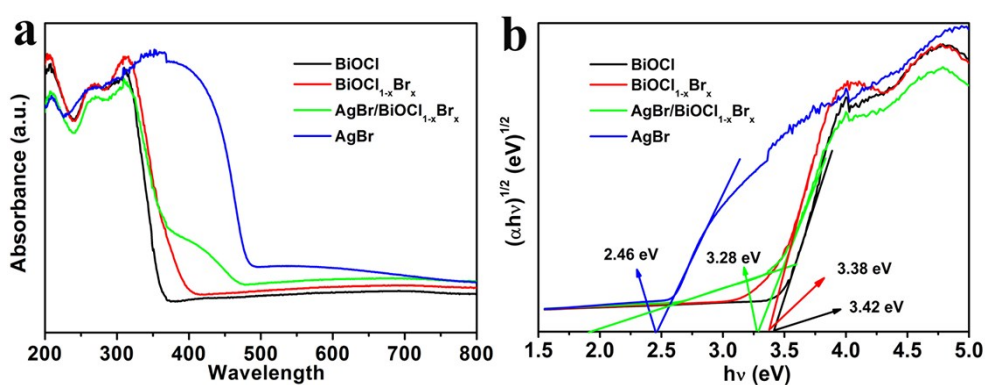

**Fig. S8** (a) UV-Vis diffuse reflectance spectra and (b) band gap energies of the samples

**Table. S1** the absorption edges, band gap energies,  $E_{CB}$  and  $E_{VB}$  of the samples

| samples                                     | absorption edge/nm | $E_g$ /eV | $E_{CB}$ /eV | $E_{VB}$ /eV |
|---------------------------------------------|--------------------|-----------|--------------|--------------|
| BiOCl                                       | 359                | 3.42      | 0.15         | 3.57         |
| AgBr                                        | 493                | 2.46      | 0.08         | 2.54         |
| $\text{BiOCl}_{1-x}\text{Br}_x$             | 400                | 3.38      | 0.15         | 3.55         |
| $\text{AgBr}/\text{BiOCl}_{1-x}\text{Br}_x$ | 430                | 3.28      |              |              |
| $\text{BiOCl}_{1-x}\text{Br}_x@AgBr$        | 450                | 3.26      |              |              |

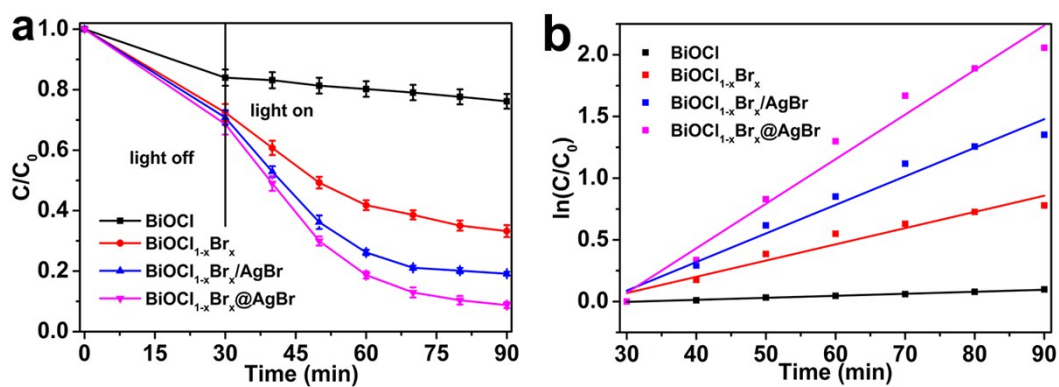

**Fig. S9** (a) photocatalytic activities, (b) kinetic fit of degradation for dyes with different samples

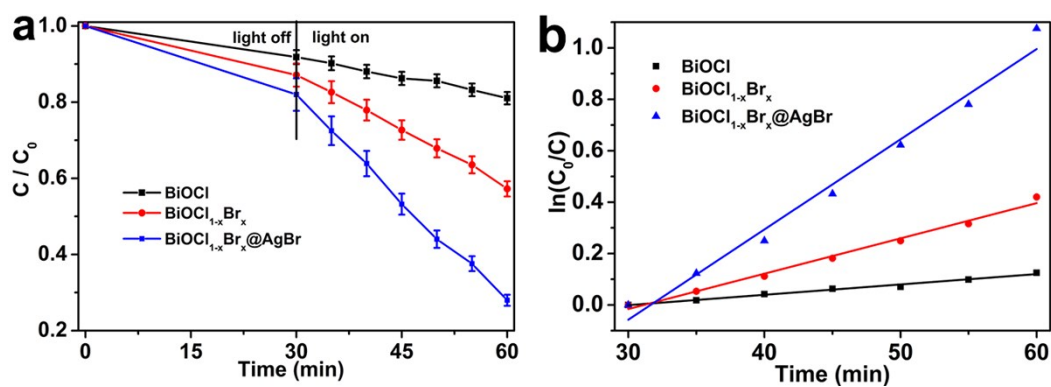

**Fig. S10** (a) photocatalytic activities and (b) kinetic fit of BiOCl, BiOCl<sub>1-x</sub>Br<sub>x</sub> and BiOCl<sub>1-x</sub>Br<sub>x</sub>@AgBr for degrading Ofloxacin

**Table. S2** The kinetic constants of different samples

| samples                                    | kinetic constant/min <sup>-1</sup><br>(for KN-R degradation) | kinetic constant/min <sup>-1</sup><br>(for OF degradation) |
|--------------------------------------------|--------------------------------------------------------------|------------------------------------------------------------|
| P25                                        | $8.2 \times 10^{-5}$                                         | ---                                                        |
| BiOCl                                      | $1.6 \times 10^{-3}$                                         | $4.0 \times 10^{-3}$                                       |
| BiOCl <sub>1-x</sub> Br <sub>x</sub>       | $1.3 \times 10^{-2}$                                         | $1.5 \times 10^{-2}$                                       |
| AgBr/BiOCl <sub>1-x</sub> Br <sub>x</sub>  | $2.3 \times 10^{-2}$                                         | ---                                                        |
| BiOCl <sub>1-x</sub> Br <sub>x</sub> @AgBr | $3.6 \times 10^{-2}$                                         | $4.1 \times 10^{-2}$                                       |

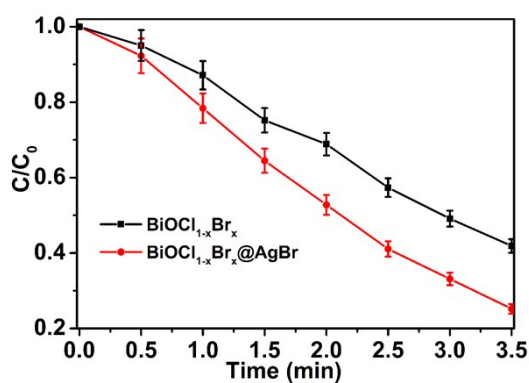

**Fig. S11** Photodegradation of phenol over BiOCl<sub>1-x</sub>Br<sub>x</sub> and BiOCl<sub>1-x</sub>Br<sub>x</sub>@AgBr

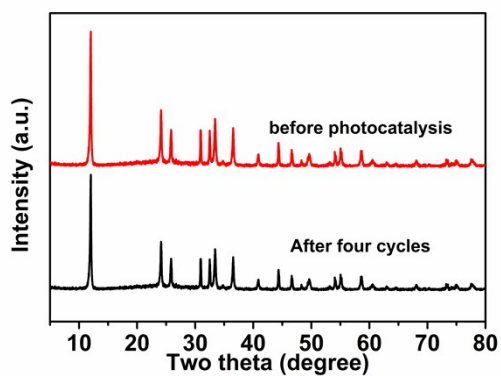

**Fig. S12** XRD patterns of BiOCl<sub>1-x</sub>Br<sub>x</sub>@AgBr before and after photocatalytic experiments



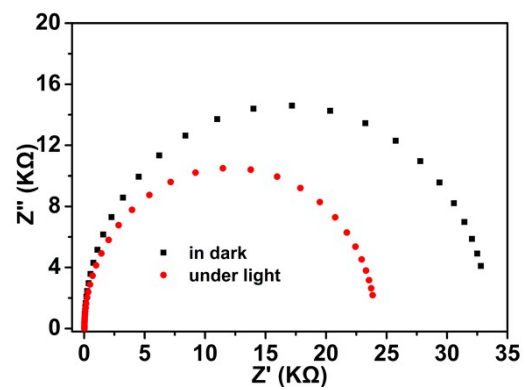

**Fig. S13** Electrochemical impedance spectroscopy under light and dark conditions for BiOCl<sub>1-x</sub>Br<sub>x</sub>@AgBr
